# Supplementary material
Source: PubMed Central journal article supplement (PMC3023185)
Supplement: tableS1.pdf [file tableS1.pdf]

Supplemental Table I. Arbitrary microRNA optical density values for C<sub>2</sub>C<sub>12</sub> myotubes.

|                    |                 |
|--------------------|-----------------|
| mmu-miR-206        | 43,243.98       |
| mmu-miR-21         | 20,904.38       |
| mmu-miR-1          | 19,683.72       |
| mmu-miR-709        | 16,129.80       |
| mmu-let-7c         | 15,845.59       |
| mmu-miR-23b        | 15,084.70       |
| mmu-let-7a         | 14,637.12       |
| mmu-miR-23a        | 13,934.45       |
| mmu-let-7b         | 13,176.28       |
| mmu-let-7d         | 9,919.23        |
| mmu-miR-199a-3p    | 9,386.58        |
| mmu-let-7f         | 9,124.23        |
| mmu-miR-214        | 8,099.70        |
| mmu-miR-125b-5p    | 7,930.31        |
| mmu-miR-26a        | 7,544.57        |
| mmu-miR-762        | 7,427.28        |
| mmu-miR-329        | 7,086.14        |
| mmu-miR-133b       | 7,042.83        |
| mmu-miR-690        | 6,680.89        |
| mmu-miR-133a       | 6,404.16        |
| mmu-miR-24         | 5,929.94        |
| mmu-let-7i         | 5,547.51        |
| <b>mmu-miR-27b</b> | <b>5,364.76</b> |
| mmu-miR-29a        | 4,656.48        |
| mmu-miR-1892       | 3,964.10        |
| mmu-let-7g         | 3,214.58        |
| mmu-miR-143        | 3,131.90        |
| mmu-miR-125a-5p    | 3,059.75        |
| mmu-miR-689        | 3,027.87        |
| mmu-miR-16         | 2,797.86        |
| <b>mmu-miR-27a</b> | <b>2,759.21</b> |
| mmu-miR-145        | 2,579.94        |
| mmu-miR-322        | 2,500.21        |
| mmu-miR-1187       | 2,386.75        |
| mmu-let-7e         | 2,345.29        |
| mmu-miR-705        | 2,334.35        |
| mmu-miR-128        | 2,236.17        |
| mmu-miR-574-5p     | 2,200.35        |
| mmu-miR-351        | 1,988.36        |
| mmu-miR-1224       | 1,676.21        |
| mmu-miR-15b        | 1,660.32        |

|                 |          |
|-----------------|----------|
| mmu-miR-30b     | 1,594.83 |
| mmu-miR-30c     | 1,558.11 |
| mmu-miR-499     | 1,434.74 |
| mmu-miR-31      | 1,364.13 |
| mmu-miR-378     | 1,313.82 |
| mmu-miR-99b     | 1,292.62 |
| mmu-miR-467f    | 1,247.74 |
| mmu-miR-191     | 1,216.33 |
| mmu-miR-720     | 1,158.36 |
| mmu-miR-92a     | 1,115.37 |
| mmu-miR-20a     | 1,105.38 |
| mmu-miR-26b     | 1,075.75 |
| mmu-miR-25      | 1,064.85 |
| mmu-miR-320     | 998.56   |
| mmu-miR-196a    | 936.85   |
| mmu-miR-17      | 906.53   |
| mmu-miR-466f-3p | 856.28   |
| mmu-miR-151-5p  | 839.14   |
| mmu-miR-182     | 735.01   |
| mmu-miR-574-3p  | 710.85   |
| mmu-miR-1196    | 690.34   |
| mmu-miR-1894-3p | 671.41   |
| mmu-miR-22      | 665.43   |
| mmu-miR-486     | 660.72   |
| mmu-miR-30a     | 659.30   |
| mmu-miR-152     | 655.09   |
| mmu-miR-221     | 653.91   |
| mmu-miR-1937b   | 653.80   |
| mmu-miR-181a    | 648.01   |
| mmu-miR-1937a   | 645.91   |
| mmu-miR-322*    | 641.31   |
| mmu-miR-1956    | 624.73   |
| mmu-miR-30d     | 612.68   |
| mmu-miR-1944    | 607.36   |
| mmu-miR-466i    | 605.72   |
| mmu-miR-103     | 577.73   |
| mmu-miR-361     | 560.93   |
| mmu-miR-669f    | 559.85   |
| mmu-miR-222     | 541.85   |
| mmu-miR-532-5p  | 520.78   |
| mmu-miR-155     | 511.88   |
| mmu-miR-181b    | 497.53   |
| mmu-miR-107     | 490.51   |

|                 |        |
|-----------------|--------|
| mmu-miR-466g    | 481.98 |
| mmu-miR-199a-5p | 461.94 |
| mmu-miR-714     | 445.81 |
| mmu-miR-1946b   | 433.75 |
| mmu-miR-805     | 433.37 |
| mmu-miR-183     | 389.20 |
| mmu-miR-19b     | 382.30 |
| mmu-miR-140*    | 365.40 |
| mmu-miR-106b    | 346.29 |
| mmu-miR-671-5p  | 337.76 |
| mmu-miR-92b     | 332.99 |
| mmu-miR-483     | 319.30 |
| mmu-miR-93      | 297.27 |
| mmu-miR-195     | 287.87 |
| mmu-miR-130a    | 279.26 |
| mmu-miR-34c*    | 275.04 |
| mmu-miR-100     | 267.40 |
| mmu-miR-99a     | 256.35 |
| mmu-miR-350     | 253.67 |
| mmu-miR-290-5p  | 248.58 |
| mmu-miR-106a    | 246.93 |
| mmu-miR-151-3p  | 237.70 |
| mmu-miR-423-5p  | 230.56 |
| mmu-miR-20b     | 225.98 |
| mmu-miR-501-3p  | 225.21 |
| mmu-miR-674     | 205.11 |
| mmu-miR-34b-3p  | 202.93 |
| mmu-miR-139-5p  | 184.28 |
| mmu-miR-382*    | 182.59 |
| mmu-miR-450a-5p | 170.03 |
| mmu-miR-1983    | 156.94 |
| mmu-miR-872     | 152.40 |
| mmu-miR-1895    | 151.73 |
| mmu-miR-466f    | 141.82 |
| mmu-miR-210     | 139.27 |
| mmu-miR-532-3p  | 135.24 |
| mmu-miR-346     | 132.45 |
| mmu-miR-146b    | 128.87 |
| mmu-miR-132     | 128.67 |
| mmu-let-7d*     | 127.51 |
| mmu-miR-30e     | 126.13 |
| mmu-miR-130b    | 125.22 |
| mmu-miR-98      | 122.25 |

|                 |        |
|-----------------|--------|
| mmu-miR-24-2*   | 120.73 |
| mmu-miR-1955    | 110.36 |
| mmu-miR-181d    | 109.16 |
| mmu-miR-28      | 105.31 |
| mmu-miR-1931    | 104.31 |
| mmu-miR-1939    | 101.60 |
| mmu-miR-34a     | 99.80  |
| mmu-miR-185     | 98.72  |
| mmu-miR-18a     | 98.56  |
| mmu-miR-674*    | 96.51  |
| mmu-miR-1839-5p | 94.31  |
| mmu-miR-467b*   | 92.94  |
| mmu-miR-484     | 90.26  |
| mmu-miR-466j    | 89.85  |
| mmu-miR-149     | 88.33  |
| mmu-miR-224     | 84.06  |
| mmu-miR-672     | 83.11  |
| mmu-miR-28*     | 82.05  |
| mmu-miR-680     | 81.73  |
| mmu-miR-1195    | 80.63  |
| mmu-miR-192     | 80.31  |
| mmu-miR-15a     | 74.18  |
| mmu-miR-133a*   | 73.68  |
| mmu-miR-181c    | 71.23  |
| mmu-miR-342-3p  | 71.11  |
| mmu-miR-1198    | 68.96  |
| mmu-miR-362-5p  | 67.67  |
| mmu-miR-378*    | 67.52  |
| mmu-miR-22*     | 67.34  |
| mmu-miR-1959    | 66.87  |
| mmu-miR-874     | 61.37  |
| mmu-miR-425     | 61.26  |
| mmu-miR-148a    | 59.91  |
| mmu-miR-421     | 58.99  |
| mmu-miR-122     | 58.26  |
| mmu-miR-615-3p  | 57.23  |
| mmu-miR-324-5p  | 56.42  |
| mmu-miR-101b    | 55.94  |
| mmu-miR-1949    | 52.60  |
| mmu-miR-708     | 50.53  |
| mmu-miR-301a    | 50.44  |
| mmu-miR-148b    | 49.85  |
| mmu-miR-374     | 49.47  |

|                 |       |
|-----------------|-------|
| mmu-miR-30a*    | 49.45 |
| mmu-miR-1971    | 48.16 |
| mmu-miR-218     | 46.35 |
| mmu-miR-675-3p  | 46.26 |
| mmu-miR-199b*   | 45.62 |
| mmu-miR-335-5p  | 45.44 |
| mmu-miR-146a    | 43.52 |
| mmu-miR-27b*    | 43.43 |
| mmu-miR-467a*   | 42.98 |
| mmu-miR-466h    | 42.93 |
| mmu-miR-328     | 38.11 |
| mmu-miR-29c     | 37.55 |
| mmu-miR-652     | 37.42 |
| mmu-miR-194     | 37.33 |
| mmu-miR-125a-3p | 37.23 |
| mmu-miR-501-5p  | 36.87 |
| mmu-miR-188-5p  | 35.70 |
| mmu-miR-1981    | 35.22 |
| mmu-miR-34c     | 34.12 |
| mmu-miR-31*     | 33.52 |
| mmu-miR-877     | 33.41 |
| mmu-miR-744     | 32.91 |
| mmu-miR-470     | 31.21 |
| mmu-miR-715     | 30.85 |
| mmu-let-7a*     | 30.80 |
| mmu-miR-542-3p  | 30.44 |
| mmu-miR-743a    | 30.30 |
| mmu-miR-296-5p  | 30.24 |
| mmu-let-7b*     | 29.29 |
| mmu-miR-503     | 28.76 |
| mmu-miR-685     | 28.53 |
| mmu-miR-341     | 28.42 |
| mmu-miR-468     | 28.03 |
| mmu-miR-681     | 27.98 |
| mmu-miR-1982*   | 27.97 |
| mmu-miR-500     | 27.88 |
| mmu-miR-207     | 27.48 |
| mmu-miR-1954    | 27.36 |
| mmu-miR-669h-3p | 26.15 |
| mmu-miR-186     | 26.02 |
| mmu-miR-872*    | 25.89 |
| mmu-miR-297a    | 25.73 |
| mmu-miR-1306    | 25.06 |

|                 |       |
|-----------------|-------|
| mmu-miR-669e    | 24.66 |
| mmu-miR-183*    | 24.60 |
| mmu-miR-1966    | 24.57 |
| mmu-miR-678     | 24.39 |
| mmu-miR-1907    | 24.02 |
| mmu-miR-7a*     | 23.99 |
| mmu-miR-1839-3p | 23.94 |
| mmu-miR-212     | 23.38 |
| mmu-miR-29b     | 22.81 |
| mmu-miR-15a*    | 22.08 |
| mmu-miR-331-3p  | 21.84 |
| mmu-miR-7a      | 21.73 |
| mmu-miR-1893    | 21.43 |
| mmu-miR-666-3p  | 21.24 |
| mmu-miR-494     | 21.14 |
| mmu-miR-465a-3p | 21.12 |
| mmu-miR-691     | 20.84 |
| mmu-miR-1897-5p | 20.46 |
| mmu-miR-344     | 20.29 |
| mmu-miR-466f-5p | 20.11 |
| mmu-miR-298     | 20.00 |
| mmu-miR-582-5p  | 19.97 |
| mmu-miR-713     | 19.95 |
| mmu-miR-450b-3p | 19.95 |
| mmu-miR-339-3p  | 19.73 |
| mmu-miR-362-3p  | 19.46 |
| mmu-miR-324-3p  | 19.44 |
| mmu-miR-145*    | 19.20 |
| mmu-miR-615-5p  | 19.20 |
| mmu-miR-1188    | 19.16 |
| mmu-miR-1968    | 19.14 |
| mmu-miR-292-5p  | 19.10 |
| mmu-miR-741     | 19.05 |
| mmu-miR-763     | 18.99 |
| mmu-miR-1967    | 18.94 |
| mmu-miR-345-5p  | 18.82 |
| mmu-miR-345-3p  | 18.73 |
| mmu-miR-1937c   | 18.70 |
| mmu-miR-1274a   | 18.58 |
| mmu-miR-106b*   | 18.32 |
| mmu-miR-760     | 18.31 |
| mmu-miR-1946a   | 18.07 |

|                 |       |
|-----------------|-------|
| mmu-miR-193*    | 18.01 |
| mmu-miR-675-5p  | 17.80 |
| mmu-miR-330*    | 17.72 |
| mmu-miR-1199    | 17.68 |
| mmu-miR-218-2*  | 17.62 |
| mmu-miR-150*    | 17.51 |
| mmu-miR-327     | 17.50 |
| mmu-miR-665     | 17.46 |
| mmu-miR-1898    | 17.40 |
| mmu-miR-296-3p  | 17.35 |
| mmu-miR-669c    | 17.15 |
| mmu-miR-214*    | 17.11 |
| mmu-miR-654-5p  | 17.10 |
| mmu-miR-466d-3p | 16.81 |
| mmu-miR-93*     | 16.76 |
| mmu-miR-702     | 16.64 |
| mmu-miR-295*    | 16.61 |
| mmu-miR-101a    | 16.25 |
| mmu-miR-96      | 16.14 |
| mmu-miR-30e*    | 16.07 |
| mmu-miR-323-5p  | 16.03 |
| mmu-let-7i*     | 15.84 |
| mmu-miR-707     | 15.76 |
| mmu-miR-1945    | 15.74 |
| mmu-miR-1965    | 15.54 |
| mmu-miR-139-3p  | 15.49 |
| mmu-miR-1940    | 15.33 |
| mmu-miR-365     | 15.27 |
| mmu-miR-671-3p  | 15.20 |
| mmu-miR-135a*   | 15.15 |
| mmu-miR-331-5p  | 15.14 |
| mmu-miR-669d    | 14.96 |
| mmu-miR-370     | 14.78 |
| mmu-miR-290-3p  | 14.75 |
| mmu-miR-451     | 14.73 |
| mmu-miR-467a    | 14.71 |
| mmu-miR-208b    | 14.70 |
| mmu-miR-455     | 14.37 |
| mmu-miR-449b    | 14.31 |
| mmu-miR-703     | 14.29 |
| mmu-miR-218-1*  | 14.20 |

|                 |       |
|-----------------|-------|
| mmu-miR-200b*   | 14.19 |
| mmu-miR-423-3p  | 14.12 |
| mmu-miR-412     | 14.07 |
| mmu-miR-21*     | 14.01 |
| mmu-miR-383     | 13.98 |
| mmu-miR-196b    | 13.95 |
| mmu-let-7g*     | 13.94 |
| mmu-miR-1964    | 13.88 |
| mmu-miR-27a*    | 13.37 |
| mmu-miR-712     | 13.02 |
| mmu-miR-150     | 12.90 |
| mmu-miR-669a    | 12.85 |
| mmu-miR-770-5p  | 12.68 |
| mmu-let-7f*     | 12.62 |
| mmu-miR-187     | 12.42 |
| mmu-miR-761     | 12.34 |
| mmu-miR-30b*    | 12.34 |
| mmu-miR-452     | 12.14 |
| mmu-miR-667     | 12.12 |
| mmu-miR-16*     | 11.86 |
| mmu-miR-669k    | 11.74 |
| mmu-miR-99b*    | 11.59 |
| mmu-miR-670     | 11.08 |
| mmu-miR-431*    | 10.82 |
| mmu-miR-465c-5p | 10.57 |
| mmu-miR-696     | 10.44 |
| mmu-miR-679     | 10.22 |
| mmu-miR-124     | 10.07 |
| mmu-miR-669b    | 10.03 |
| mmu-miR-193b    | 10.01 |
| mmu-miR-15b*    | 9.76  |
| mmu-miR-497     | 9.22  |
| mmu-miR-1957    | 9.11  |
| mmu-miR-1962    | 8.79  |
