# Supplementary material
Source: PubMed Central journal article supplement (PMC3023185)
Supplement: tableS2.pdf [file tableS2.pdf]

**Supplemental Table II. Arbitrary microRNA optical density values for mouse TA muscle.**

|                 |        |
|-----------------|--------|
| mmu-miR-1       | 59,163 |
| mmu-miR-709     | 30,155 |
| mmu-miR-2142    | 23,197 |
| mmu-miR-762     | 15,403 |
| mmu-miR-133a    | 6,867  |
| mmu-miR-133b    | 6,130  |
| mmu-let-7a      | 5,015  |
| mmu-miR-2146    | 4,724  |
| mmu-let-7c      | 4,243  |
| mmu-let-7d      | 3,616  |
| mmu-let-7f      | 3,452  |
| mmu-miR-2140    | 2,857  |
| mmu-let-7b      | 2,832  |
| mmu-miR-26a     | 2,677  |
| mmu-miR-1937a   | 1,842  |
| mmu-miR-1937a   | 1,842  |
| mmu-miR-1937b   | 1,702  |
| mmu-miR-1895    | 1,531  |
| mmu-miR-574-5p  | 1,506  |
| mmu-miR-466f-3p | 1,419  |
| mmu-miR-690     | 1,183  |
| mmu-miR-467b*   | 1,112  |
| mmu-miR-206     | 974    |
| mmu-miR-720     | 931    |
| mmu-miR-720     | 931    |
| mmu-miR-1187    | 868    |
| mmu-miR-1187    | 868    |
| mmu-miR-467f    | 801    |
| mmu-miR-467f    | 801    |
| mmu-miR-705     | 791    |
| mmu-let-7i      | 767    |
| mmu-miR-483     | 738    |
| mmu-miR-483     | 738    |
| mmu-miR-466g    | 726    |
| mmu-miR-1892    | 721    |
| mmu-miR-23b     | 679    |
| mmu-miR-122     | 673    |
| mmu-miR-467a*   | 620    |
| mmu-miR-145     | 596    |
| mmu-miR-466i    | 593    |

|                    |            |
|--------------------|------------|
| mmu-miR-466i       | 593        |
| mmu-miR-669f       | 567        |
| mmu-miR-669f       | 567        |
| mmu-miR-126-3p     | 538        |
| mmu-miR-23a        | 529        |
| mmu-miR-671-5p     | 521        |
| mmu-miR-2134       | 496        |
| mmu-miR-2141       | 446        |
| mmu-miR-378        | 434        |
| mmu-miR-125b-5p    | 424        |
| mmu-let-7e         | 404        |
| mmu-let-7e         | 404        |
| mmu-let-7g         | 379        |
| mmu-let-7g         | 379        |
| mmu-miR-1224       | 336        |
| mmu-miR-2145       | 331        |
| mmu-miR-24         | 322        |
| mmu-miR-30c        | 296        |
| mmu-miR-486        | 287        |
| mmu-miR-805        | 283        |
| mmu-miR-329        | 282        |
| mmu-miR-574-3p     | 280        |
| mmu-miR-22         | 268        |
| mmu-miR-2138       | 239        |
| mmu-miR-143        | 238        |
| mmu-miR-191        | 213        |
| mmu-miR-214        | 198        |
| mmu-miR-361        | 197        |
| mmu-miR-1897-5p    | 195        |
| mmu-miR-320        | 181        |
| mmu-miR-1940       | 166        |
| mmu-miR-714        | 165        |
| mmu-miR-1956       | 158        |
| mmu-miR-698        | 152        |
| mmu-miR-30d        | 152        |
| mmu-miR-181a       | 150        |
| mmu-miR-669n       | 145        |
| mmu-miR-16         | 140        |
| mmu-miR-2144       | 139        |
| mmu-miR-1966       | 128        |
| mmu-miR-199a-3p    | 126        |
| <b>mmu-miR-27b</b> | <b>124</b> |
| mmu-miR-669c       | 120        |

|                    |           |
|--------------------|-----------|
| mmu-miR-195        | 108       |
| mmu-miR-30b        | 106       |
| mmu-miR-151-5p     | 105       |
| mmu-miR-29a        | 105       |
| mmu-miR-1946b      | 100       |
| mmu-miR-2132       | 98        |
| mmu-miR-568        | 90        |
| mmu-miR-761        | 89        |
| mmu-miR-1931       | 84        |
| mmu-miR-128        | 83        |
| mmu-miR-125a-5p    | 83        |
| mmu-miR-2133       | 82        |
| mmu-miR-1894-3p    | 79        |
| mmu-miR-99b        | 76        |
| mmu-miR-494        | 75        |
| mmu-miR-30a        | 74        |
| mmu-miR-26b        | 68        |
| mmu-miR-1955       | 67        |
| mmu-miR-689        | 67        |
| mmu-miR-467g       | 67        |
| mmu-miR-703        | 66        |
| mmu-miR-2136       | 63        |
| mmu-miR-150        | 60        |
| mmu-let-7d*        | 59        |
| mmu-miR-466f       | 56        |
| mmu-miR-103        | 55        |
| mmu-miR-485*       | 54        |
| mmu-miR-2143       | 54        |
| mmu-miR-2137       | 54        |
| mmu-miR-1196       | 53        |
| mmu-miR-467e*      | 52        |
| mmu-miR-127        | 50        |
| <b>mmu-miR-27a</b> | <b>50</b> |
| mmu-miR-107        | 49        |
| mmu-miR-100        | 47        |
| mmu-miR-672        | 45        |
| mmu-miR-92a        | 45        |
| mmu-miR-1195       | 44        |
| mmu-miR-466f-5p    | 43        |
| mmu-miR-140        | 43        |
| mmu-miR-1971       | 43        |
| mmu-miR-25         | 43        |
| mmu-miR-382*       | 42        |

|                 |    |
|-----------------|----|
| mmu-miR-423-5p  | 42 |
| mmu-miR-678     | 40 |
| mmu-miR-200c    | 40 |
| mmu-miR-466j    | 39 |
| mmu-miR-99a     | 39 |
| mmu-miR-451     | 38 |
| mmu-miR-185     | 38 |
| mmu-miR-674     | 38 |
| mmu-miR-685     | 37 |
| mmu-miR-188-5p  | 37 |
| mmu-miR-1960    | 36 |
| mmu-miR-140*    | 35 |
| mmu-miR-468     | 34 |
| mmu-miR-328     | 33 |
| mmu-miR-378*    | 32 |
| mmu-miR-130a    | 32 |
| mmu-miR-146a    | 32 |
| mmu-miR-744     | 31 |
| mmu-miR-133a*   | 30 |
| mmu-miR-15b     | 30 |
| mmu-miR-10b     | 30 |
| mmu-miR-222     | 28 |
| mmu-miR-691     | 27 |
| mmu-miR-466h    | 26 |
| mmu-miR-669h-3p | 26 |
| mmu-miR-665     | 26 |
| mmu-miR-92b     | 25 |
| mmu-miR-379     | 25 |
| mmu-miR-151-3p  | 25 |
| mmu-miR-2135    | 25 |
| mmu-miR-764-5p  | 24 |
| mmu-miR-466d-3p | 24 |
| mmu-miR-17      | 23 |
| mmu-miR-382     | 23 |
| mmu-miR-466e-5p | 23 |
| mmu-miR-715     | 23 |
| mmu-miR-1903    | 22 |
| mmu-miR-434-3p  | 22 |
| mmu-miR-327     | 21 |
| mmu-miR-98      | 21 |
| mmu-miR-1188    | 20 |
| mmu-miR-713     | 19 |
| mmu-miR-466c-5p | 18 |

|                 |    |
|-----------------|----|
| mmu-miR-1839-5p | 17 |
| mmu-miR-196a    | 17 |
| mmu-miR-377     | 16 |
| mmu-miR-144     | 16 |
| mmu-miR-299*    | 16 |
| mmu-miR-542-5p  | 16 |
| mmu-miR-669e    | 15 |
| mmu-miR-297a    | 15 |
| mmu-miR-30a*    | 14 |
| mmu-miR-155     | 14 |
| mmu-miR-466d-5p | 13 |
| mmu-miR-669d    | 13 |
| mmu-miR-28      | 12 |
| mmu-miR-21      | 12 |
| mmu-miR-467h    | 12 |
| mmu-miR-129-5p  | 12 |
| mmu-miR-210     | 11 |
| mmu-miR-290-5p  | 10 |
| mmu-miR-370     | 10 |
| mmu-miR-770-5p  | 9  |
| mmu-miR-33      | 9  |
| mmu-miR-184     | 9  |
| mmu-miR-1902    | 8  |
| mmu-miR-29b*    | 8  |
| mmu-miR-325*    | 6  |
| mmu-miR-29c     | 6  |
| mmu-miR-22*     | 5  |
| mmu-miR-302a    | 3  |
